# Supplementary material for: Cryo-EM Structures of the Hsp104 Protein Disaggregase Captured in the ATP Conformation
Source: PubMed Central journal article supplement — Cell Rep. Author manuscript; Available in PMC 2019 Jan 25. (PMC6347426; doi:10.1016/j.celrep.2018.12.037), 2019-01-02
Supplement: NIHMS1517823-supplement-1.pdf [file NIHMS1517823-supplement-1.pdf]

**Cell Reports, Volume 26**

**Supplemental Information**

**Cryo-EM Structures of the Hsp104 Protein**

**Disaggregase Captured in the ATP Conformation**

**Sukyeong Lee, Soung Hun Roh, Jungsoon Lee, Nuri Sung, Jun Liu, and Francis T.F. Tsai**

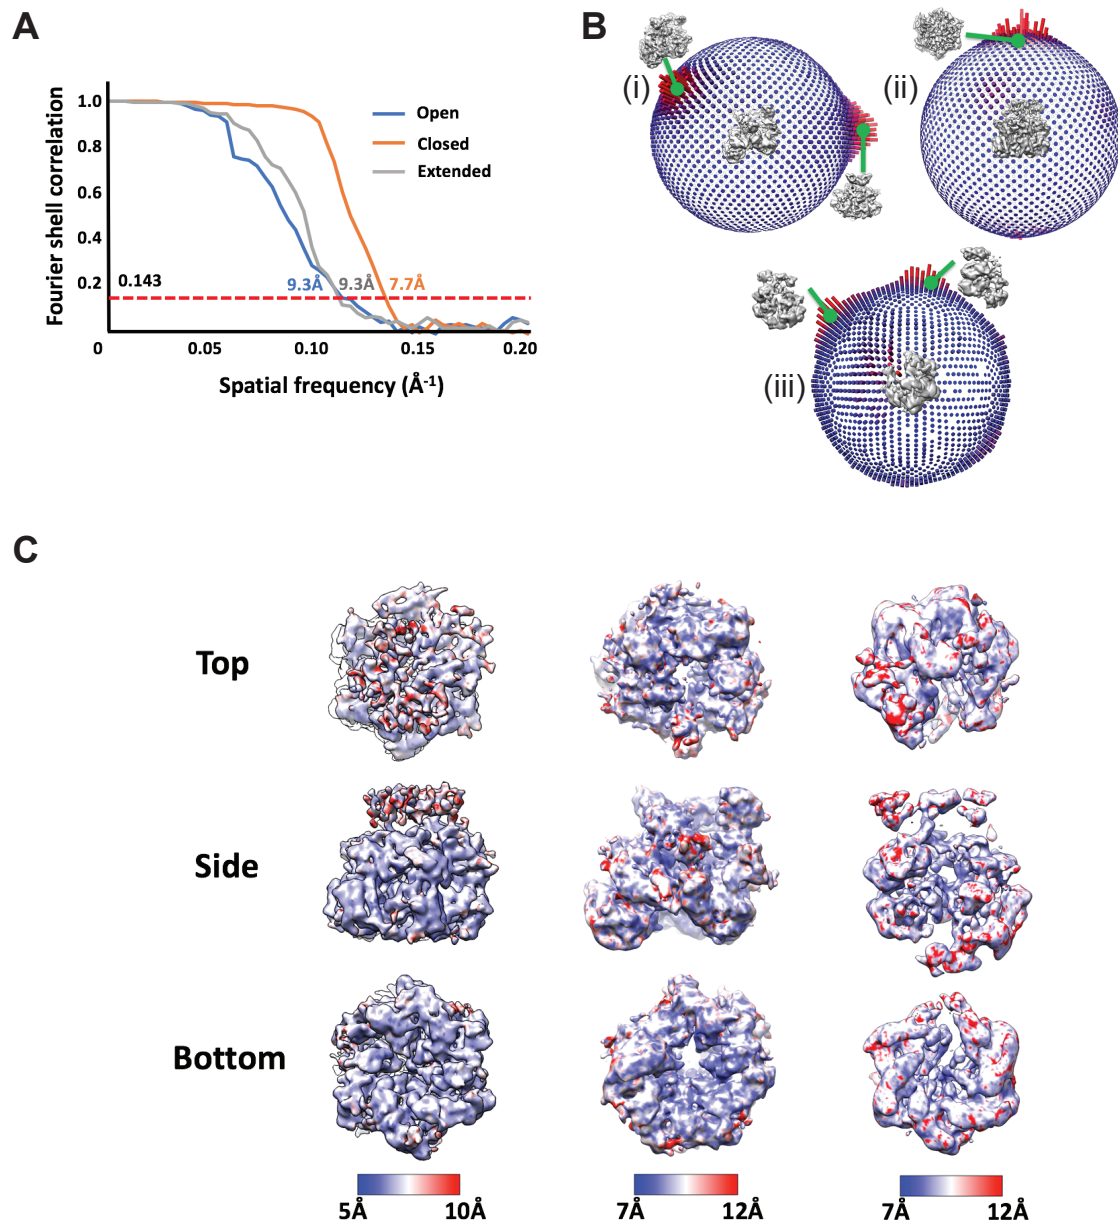

**Figure S1. Three-dimensional reconstructions of Hsp104<sub>DWB</sub>-ATP. Related to Figure 2.**

(A) Gold-standard Fourier shell correlation (FSC) of Hsp104<sub>DWB</sub> in the open, closed, and extended conformation. (B) Angular distribution histogram of open (i), closed (ii), and extended (iii) conformation of Hsp104<sub>DWB</sub>. (C) Local resolution of the reconstruction of the closed (left), open (middle), and extended conformation (right column) estimated by ResMap (Kucukelbir et al., 2014). Top, side, and bottom views are shown.

**Table S1. Data Collection, Processing, and 3D Reconstruction. Related to Figure 2.**

| <b>Data Collection and 3D Reconstruction</b> | <b>Instrument/Software/Settings</b>                      | <b>Specifics</b>                                       |
|----------------------------------------------|----------------------------------------------------------|--------------------------------------------------------|
| Grid                                         | Cu (Quantifoil)                                          | 400 mesh 1.2/1.3                                       |
| Cryo-specimen freezing                       | Vitrobot (FEI)                                           | Single blot, 95% relative humidity,<br>2 sec blot time |
| Electron microscope                          | Polara G2 (FEI)                                          | 300 keV                                                |
| Detector                                     | Gatan K2 Summit                                          | 4K X 4K, 5 $\mu$ m pixel size                          |
| Sampling interval                            | 0.84 Å/Pixel                                             | Super-resolution, 1.68 Å/Pixel<br>(2X2 binned)         |
| Exposure rate on specimen                    | 5 e <sup>-</sup> /Å <sup>2</sup> /sec                    | 5 frames/sec                                           |
| Exposure time                                | 7.6 sec                                                  | Total dose 38 e <sup>-</sup> /Å <sup>2</sup>           |
| Drift correction                             | Unblur with exposure filter                              | 1,394 movies                                           |
| Defocus range                                | 0.7 – 4 $\mu$ m                                          |                                                        |
| Defocus determination                        | CTFFIND4                                                 |                                                        |
| Particles picked                             | RELION 1.4                                               |                                                        |
| Particle box size                            | 160 X 160                                                |                                                        |
| Number of particles used                     | Closed (56,859)<br>Open (25,582)<br>Extended (33,666)    | out of 256,378 boxed particles                         |
| Initial map generation                       | EMAN 2.1                                                 |                                                        |
| Map refinement                               | RELION 1.4                                               |                                                        |
| Resolution                                   | 7.7 Å for Closed<br>9.3 Å for Open<br>9.3 Å for Extended | Gold standard FSC at 0.143                             |
| Modeling                                     | Chimera                                                  |                                                        |
